# Supplementary material for: Pharmacokinetics, safety and tolerability of valbenazine in Korean CYP2D6 normal and intermediate metabolizers
Source: PubMed Central journal article supplement — Clin Transl Sci. 2022 Dec 27;16(3):512–23. doi: 10.1111/cts.13466 (PMC10014685; doi:10.1111/cts.13466), 2022-12-27
Supplement: CTS-16-512-s001.pdf [file CTS-16-512-s001.pdf]

**Table S1. CYP2D6 genotype-phenotype table used in the study**

|          | Allele 2 |    |    |    |    |    |    |    |    |    |     |     |     |     |     |     |     |     |     |      |      |
|----------|----------|----|----|----|----|----|----|----|----|----|-----|-----|-----|-----|-----|-----|-----|-----|-----|------|------|
|          | .        | *1 | *2 | *3 | *4 | *5 | *6 | *7 | *8 | *9 | *10 | *11 | *12 | *14 | *15 | *17 | *29 | *35 | *41 | *1AM | *2AM |
| Allele 1 | *1       | NM | NM | IM | IM | IM | IM | IM | IM | NM | NM  | IM  | IM  | IM  | IM  | NM  | NM  | NM  | NM  | UM   | UM   |
|          | *2       |    | NM | IM | IM | IM | IM | IM | IM | NM | NM  | IM  | IM  | IM  | IM  | NM  | NM  | NM  | NM  |      | UM   |
|          | *3       |    |    | PM | PM | PM | PM | PM | PM | IM | IM  | PM  | PM  | PM  | PM  | IM  | IM  | IM  | IM  |      |      |
|          | *4       |    |    |    | PM | PM | PM | PM | PM | IM | IM  | PM  | PM  | PM  | PM  | IM  | IM  | IM  | IM  |      |      |
|          | *5       |    |    |    |    | PM | PM | PM | PM | IM | IM  | PM  | PM  | PM  | PM  | IM  | IM  | IM  | IM  |      |      |
|          | *6       |    |    |    |    |    | PM | PM | PM | IM | IM  | PM  | PM  | PM  | PM  | IM  | IM  | IM  | IM  |      |      |
|          | *7       |    |    |    |    |    |    | PM | PM | IM | IM  | PM  | PM  | PM  | PM  | IM  | IM  | IM  | IM  |      |      |
|          | *8       |    |    |    |    |    |    |    | PM | IM | IM  | PM  | PM  | PM  | PM  | IM  | IM  | IM  | IM  |      |      |
|          | *9       |    |    |    |    |    |    |    |    | IM | IM  | IM  | IM  | IM  | IM  | IM  | IM  | NM  | IM  |      |      |
|          | *10      |    |    |    |    |    |    |    |    |    | IM  | NM  | IM  |      |      |
|          | *11      |    |    |    |    |    |    |    |    |    |     | PM  | PM  | PM  | PM  | IM  | IM  | IM  | IM  |      |      |
|          | *12      |    |    |    |    |    |    |    |    |    |     |     | PM  | PM  | PM  | IM  | IM  | IM  | IM  |      |      |
|          | *14      |    |    |    |    |    |    |    |    |    |     |     |     | PM  | PM  | IM  | IM  | IM  | IM  |      |      |
|          | *15      |    |    |    |    |    |    |    |    |    |     |     |     |     | PM  | IM  | IM  | IM  | IM  |      |      |
|          | *17      |    |    |    |    |    |    |    |    |    |     |     |     |     |     | IM  | IM  | NM  | IM  |      |      |
|          | *29      |    |    |    |    |    |    |    |    |    |     |     |     |     |     |     | IM  | NM  | IM  |      |      |
|          | *35      |    |    |    |    |    |    |    |    |    |     |     |     |     |     |     |     | NM  | NM  |      |      |
|          | *41      |    |    |    |    |    |    |    |    |    |     |     |     |     |     |     |     |     | IM  |      |      |

\*#AM: \*# allele multiplication; UM: ultrarapid metabolizer; NM: normal metabolizer; IM: intermediate metabolizer; PM: poor metabolizer
